1           **Menstrual hygiene management improvement in selected communities**  
2                                 **using nurturing care group approach**

3  
4   Bismark Dwumfour-Asare<sup>1\*</sup>, Eugene Appiah-Effah<sup>2</sup>, James Ben Tidwell<sup>3</sup>, and Kwabena  
5   Biritwum Nyarko<sup>2</sup>

6  
7   <sup>1</sup>Department of Environmental Health & Sanitation Education, Faculty of Environment and  
8   Health Education, Akenten Appiah-Menka University of Skills Training and Entrepreneurial  
9   Development, Asante Mampong Campus, Ghana.

10  
11   <sup>2</sup>Regional Water and Environmental Sanitation Centre Kumasi, Department of Civil  
12   Engineering, College of Engineering, Kwame Nkrumah University of Science and  
13   Technology, Kumasi, Ghana.

14  
15   <sup>3</sup>International Programs Group, World Vision US, Federal Way Washington, US.

16  
17  
18   \*Correspondence: [dwumfourasare@gmail.com](mailto:dwumfourasare@gmail.com)  
19

**NOTE: This preprint reports new research that has not been certified by peer review and should not be used to guide clinical practice.**

21 **Abstract**

22 Improved menstrual hygiene management (MHM) is key to socioeconomic empowerment of  
23 women through improved well-being. Safe MHM is challenging in developing countries  
24 especially in rural and low-income settings. The study assessed the influence of World Vision’s  
25 piloted project of Nurturing Care Group approach on MHM in rural communities of Ghana.  
26 Four (4) communities each from Savelugu Municipal and Sekyere East District Assemblies  
27 were selected for a cross-sectional qualitative survey using 16 focus group discussions. Data  
28 was analysed using inductive mixed method with content analysis. Findings from 162 study  
29 participants showed satisfactory MHM awareness and practices among young and old females;  
30 MHM awareness and education sources included relatives, friends, NGOs, public and social  
31 institutions (e.g., health centres, churches, schools etc); intervention improved MHM  
32 understanding, behaviour and personal hygiene practices. Some MHM challenges that  
33 persisted included non-availability and prohibitive high cost of MHM materials, burden of  
34 managing menstrual pains, inadequate knowledge in handling menstrual intricacies, menstrual  
35 taboos, and stigma. Menstrual stigma was comparatively low among intervention communities  
36 than controls, but there was no difference regarding menstrual taboos across all communities  
37 largely due to religious and superstitious beliefs. Championing local production and use of  
38 reusable menstrual pads from fabrics was considered an innovation to ease sanitary pad cost  
39 burden and non-availability of menstrual pads. MHM was positively influenced through  
40 improved understanding of personal hygiene practices, and reduced stigmatization among  
41 others. Subsequent interventions would require adequate scope and resources to work with  
42 stakeholders to facilitate change processes with persistent MHM challenge like taboos.

43

44 **Keywords:** challenges; education; menstrual hygiene; rural settings; stigma; taboos; women.

45

## 46 **1 Introduction**

47 Menstrual hygiene management (MHM) is relevant to achieving the sustainable development  
48 goals (SDGs) linked to i) SDG 3 – good health and well-being, ii) SDG 4 – inclusiveness and  
49 quality education, iii) SDG 5 – gender equality and women’s empowerment, SDG 6 – clean  
50 water and sanitation, and SDG 8 – decent work and economic growth. These goals are key to  
51 in addressing the needs of women, girls, and especially those in vulnerable situations. People  
52 who menstruate face multiple challenges in managing their menstruation in homes, schools and  
53 workplaces (1). The challenges are compounded by factors like long distances from home to  
54 school, poverty, and lack of facilities (water, toilets and changing rooms) etc especially in rural  
55 areas (2-4). Others include lack of menstrual materials, menstrual stigma and taboos, period  
56 pains and other associated menstrual illness (distress, dysmenorrhoea, headache and excessive  
57 bleeding) (5, 6). Thus, dignity and well-being of menstruators in low-income settings are  
58 affected by the quality of menstrual hygiene management (7). Yet, menstruators face  
59 challenges due to little knowledge about menstruation and/or lack of information on safe  
60 menstrual hygiene practices (8).

61  
62 Menstruators exist in all settings worldwide, yet menstruation is still shrouded in silence in  
63 many cultures. The stigma associated with menstruation has been universal whether in Asia,  
64 Africa, Australia and America (9). Some cultures, like Nepal and the Pacific, still implore  
65 women to stay in secluded locations like menstrual huts during their period (10, 11). Some  
66 restrictions, such as avoiding household chores are perceived as desirable by women (12). For  
67 instance, among the Akans in Ghana, women are faced with multiple restrictions against certain  
68 engagements such as visiting shrines, attending palace hearings, and cooking for husbands  
69 (and/ or male household members) when menstruating, emphasizing the existence of social  
70 seclusion of women (13).

71  
72 Urgent attention is therefore needed on the challenges of MHM such as articulated earlier  
73 including stigma and taboos (and the fear thereof), poor hygiene practices, lack of antidote for  
74 menstrual pains and other illnesses (14-16). MHM constraints create menstrual poverty  
75 including other restrictions like inadequate education and training (17), and teasing adolescent  
76 girls with period stains and/ or odour (18). Menstrual poverty also limits socio-economic  
77 empowerment in low and middle-income countries (19). Thus, for healthy and productive  
78 lifestyle, and dignified lives, addressing practical concerns is key (20).

79  
80 Recent campaigns for improved MHM emphasise positive period and female empowerment  
81 (21). Efforts to change the narrative about MHM are pushing interventions to break  
82 menstruation stigma and taboos by providing relevant knowledge, skills and resources (22).  
83 Interventions provide opportunities to women, girls and communities to speak about menarche  
84 and period myths which are intrinsically linked to local menstrual taboos (12, 17).

85  
86 World Vision piloted the Nurturing Care Group (NCG) approach in Ghana from June 2019 to  
87 January 2021 in two (2) programme areas – Savelugu Municipal Assembly and Sekyere East  
88 District Assembly. The NCG approach has been described in detail in a forthcoming paper on  
89 animal faeces management (AFM) (23), a core of the two project components in the NCG  
90 intervention. Moreover, the model was based behaviour change approach which empowered  
91 volunteer group leaders to create a multiplying effect to reach households through neighbour-  
92 to-neighbour contacts, home visits and group meetings (24, 25). The NCG pilot project was  
93 designed to focus mainly on improving MHM and AFM among others in selected communities.  
94 The target was addressing MHM and AFM challenges in home and community management  
95 through collective action for health and development, safe water, sanitation and hygiene etc.

96 (24). MHM and AFM are usually neglected in environmental sanitation and/ or WASH  
97 interventions in communities.

98  
99 The qualitative evaluation study of the NCG pilot project is split into two separate papers  
100 because of the complexity of concept presentations making it impossible for a single clear and  
101 digestible integrative article, and contrasting scope and themes of project components with  
102 distinct attributes (26). This paper on one part presents the qualitative assessment of the MHM  
103 component of the NCG pilot project while the other forthcoming paper, Dwumfour-Asare et  
104 al. (23), shares the findings on the AFM. This study reports on the effectiveness of the MHM  
105 component in terms of knowledge transmission, behaviour change practices, and changing  
106 social norms (breaking stigma and taboos) and yet prevailing barriers in the study communities.  
107

## 108 **2. Methodology**

### 109 **2.1 Description of the Study Area**

110 The study was undertaken in the two districts - Savelugu Municipal and Sekyere East District  
111 Assemblies in Ghana. While Savelugu Assembly is dominated by the Mole-Dagbani (88.4%)  
112 ethnic groups, and Moslems (95%), the Akans are the majority tribe (85%) with most  
113 worshippers (76%) being in Sekyere East District (27, 28). More information about the study  
114 areas including some sociodemographic data is shared in details in the paper on animal faeces  
115 management (AFM) component of the NCG pilot project (23).  
116

### 117 **2.2 Study Approach and Data Collection**

118 A cross-sectional qualitative survey was carried out in communities with and without the  
119 NCGA project intervention. The data collection campaign took place between 22<sup>nd</sup> November  
120 2021 and 11<sup>th</sup> December 2021 in 8 communities: 4 each from Savelugu Municipal and Sekyere  
121 East District Assemblies. The survey involved 16 focus group discussions (FGDs) with two  
122 main women groups (those above 25 years old, and those below 25 years i.e., 15 – 25 years) in  
123 each selected community. In each district, two intervention communities (1 successful and 1  
124 less successful based on animal faecal management component of the intervention) and two  
125 control (non-intervention) communities were randomly selected. Females who were in the  
126 community at the time of the NCG intervention were recruited as study participants based on  
127 their availability at the time of the survey by random hand-picking by community leaders and/  
128 or care group leaders.

129 The FGD sessions were facilitated using FGD guide with questions based on the key themes:  
130 background of the NCG program, participants' sources and kind of information on MHM  
131 before intervention, specific knowledge acquired/lessons recall, lesson spill over from  
132 intervention communities to non-intervention areas, and existing barriers to MHM. The FGDs  
133 were held using the two local languages of participants like the forthcoming AFM paper (23).  
134 Two qualified translators were recruited with the support of the Savelugu World Vision Area  
135 Program Office. The FGD sessions took between 1 and 1.25 hours to complete with audio and  
136 field notes recorded.  
137

### 138 **2.3 Data Management and Analysis**

139 First, data from the FGDs were transcribed and organized using Microsoft Word similar to the  
140 AFM paper (23) adapting the three-stage approach to minimize errors – using audio recording  
141 and field notes together by careful listening before transcriptions (29). All transcribed data were  
142 finally transferred to Microsoft Excel database for data analyses following key terms for trends  
143 and prevalence, and inductive mixed method with content analysis, including careful

144 identification of emerging topical themes and supporting synthesis with verbatim quotes (30,  
145 31).  
146

## 147 2.4 Ethical Considerations

148 Ethical clearance certificate was secured from the Committee on Human Research and  
149 Publications Ethics (CHRPE) of the Kwame Nkrumah University of Science Technology was  
150 sought with reference number Ref: CHRPE/AP/418/21 before field work was executed. All  
151 approved protocols were followed including informed consent from participants after reading  
152 and explaining information about the study to them. The verbal informed consent from  
153 participants was witnessed by the leaders who led participants' recruitment and the consent  
154 was documented as part of the field recordings (audio and field notes).  
155

## 156 2.5 Limitations of the study

157 The key limitations are that – the findings are limited to the few selected communities in the  
158 two pilot district assemblies. The study is focused on tracking the immediate effect or influence  
159 of the project intervention to understand some relevant lessons from participants' or  
160 beneficiaries' perspective. The study is not an impact evaluation of the NCG pilot project but  
161 an assessment to understand any immediate influence felt in communities and what did not  
162 work well to inform future interventions.  
163

## 164 3. Results

### 165 3.1 FGD Participants

166 The study participants communities and participants were mainly subsistence farmers. Table 1  
167 presents the two (2) main FGD categories – women under 25 years, and those above 25 years  
168 from four (4) intervention and four (4) control communities. The group sizes ranged from 6 to  
169 15 participants, with an average of 10 members per focus group. The total participants involved  
170 in the study were 162 women (young and old).  
171

172 *Table 1: Number of participants for the FGDs in the study*

| District     | Community | Type of community | Participants of Focus Groups |           |
|--------------|-----------|-------------------|------------------------------|-----------|
|              |           |                   | <25 years                    | >25 years |
| Savelugu     | Gbumbum   | Intervention      | 9                            | 11        |
|              | Zieng     | Intervention      | 6                            | 8         |
|              | Naprisi   | Control           | 8                            | 9         |
|              | Kukobila  | Control           | 7                            | 7         |
| Sekyere East | Asukokor  | Intervention      | 14                           | 14        |
|              | Feyiase   | Intervention      | 7                            | 15        |
|              | Nsutam    | Control           | 10                           | 12        |
|              | Tetekaso  | Control           | 11                           | 14        |
| <b>Total</b> |           |                   | <b>72</b>                    | <b>90</b> |

173  
174 Table 2 presents the results of thematic analyses of responses on sources of menstrual  
175 awareness and education; challenges with menstrual hygiene management; and existing  
176 menstrual stigma, taboos and myths.  
177

178 Participants largely received awareness and education on MHM especially for the first time  
179 from relatives and/ or friends, and subsequently from NGOs, and other public institutions. The  
180 challenges with MHM were mostly period poverty – attributed to lack of access to MHM

181 materials, and inability to afford materials, followed by the burden of managing menstrual  
182 pains and related illnesses. Menstrual stigma and taboos existed in the communities, and these  
183 were embedded directly or indirectly in religio-cultural beliefs and practices including myths.  
184 The results showed mixed trends in terms of differences between intervention and control  
185 communities and across age groups.  
186

187 **Table 2: Key and sub themes analyses from the focus group discussions.**

| Main and sub themes                                                                            | Focus Groups Contributing to Themes |         |          |          | Some referenced quotes                                                                                                                                                                                                                                                                                                                                                                                                                                                                      |
|------------------------------------------------------------------------------------------------|-------------------------------------|---------|----------|----------|---------------------------------------------------------------------------------------------------------------------------------------------------------------------------------------------------------------------------------------------------------------------------------------------------------------------------------------------------------------------------------------------------------------------------------------------------------------------------------------------|
|                                                                                                | Intervention                        | Control | > 25 yrs | < 25 yrs |                                                                                                                                                                                                                                                                                                                                                                                                                                                                                             |
| <b>Sources of MHM education</b>                                                                |                                     |         |          |          |                                                                                                                                                                                                                                                                                                                                                                                                                                                                                             |
| i) <b>Relatives and friends (e.g. mothers, grandmothers, aunts, friends etc.)</b>              | 8                                   | 8       | 8        | 8        | “Our mothers, aunts and from friends taught us”. ( <i>Control community Naprisi, &lt;25 yrs FGD</i> )                                                                                                                                                                                                                                                                                                                                                                                       |
| ii) <b>NGOs</b>                                                                                | 3                                   | 0       | 1        | 2        | “...from other NGOs like CAMFED” ( <i>Intervention community Zieng, &lt;25yrs FGD</i> )<br>“...World Vision team shared lessons with us. World Vision in the year 2020.” ( <i>Intervention community Asukorkor, both FGDs</i> )                                                                                                                                                                                                                                                             |
| iii) <b>Other public institutions (e.g., MMDAs, schools, churches, health facilities etc.)</b> | 5                                   | 8       | 5        | 8        | “...at school our class teacher and madam taught us about managing your menstrual period.” ( <i>Intervention community Gbumgbum, &lt;25 yrs FGD</i> )<br>“Church through the youth ministry, I was around eleven years old – remarked one participant” ( <i>Intervention community Feyiase, &lt;25 yrs FGD</i> )                                                                                                                                                                            |
| <b>Challenges with MHM</b>                                                                     |                                     |         |          |          |                                                                                                                                                                                                                                                                                                                                                                                                                                                                                             |
| i) <b>Lack of readily access to MHM materials</b>                                              | 4                                   | 1       | 2        | 3        | “...access to sanitary pads challenging, you could get them in the next village.” ( <i>Intervention community Gbumgbum &lt;25yrs FGD</i> )<br>“...depend on rags (used cloth pieces) as improvised menstrual pads which are not able to function well especially during heavy flow of menses and you could get yourself soiled/stained” ( <i>Intervention community Zieng &gt;25 yrs FGD</i> )<br>“High cost of buying sanitary pads” ( <i>Control community Kokobila, &lt;25 yrs FGD</i> ) |
| ii) <b>MHM materials are expensive</b>                                                         | 1                                   | 5       | 1        | 5        | “How to raise money to buy sanitary pad has been a big issue for us...” ( <i>Control community Naprisi, &lt;25 yrs FGD</i> )                                                                                                                                                                                                                                                                                                                                                                |

| Main and sub themes                                                                                                                                                 | Focus Groups Contributing to Themes |         |          |          | Some referenced quotes                                                                                                                                                                                                                                                                                                                                                                                                                     |
|---------------------------------------------------------------------------------------------------------------------------------------------------------------------|-------------------------------------|---------|----------|----------|--------------------------------------------------------------------------------------------------------------------------------------------------------------------------------------------------------------------------------------------------------------------------------------------------------------------------------------------------------------------------------------------------------------------------------------------|
|                                                                                                                                                                     | Intervention                        | Control | > 25 yrs | < 25 yrs |                                                                                                                                                                                                                                                                                                                                                                                                                                            |
| <b>iii) Burden of managing menstrual pains (cramps) and related illnesses</b>                                                                                       | 6                                   | 7       | 7        | 6        | <p>“... challenges with menstrual cramps/pains but none talks about it as a shrouded secret thing” (<i>Control community Naprisi, &gt;25 yrs FGD</i>)</p> <p>“... severe menstrual pains and mostly depend on drugs for relief (e.g., cipro, paracetamol etc), ... and associated diarrhoea episodes with our periods.” (<i>Control community Nsutam, &gt;25 yrs FGD</i>)</p>                                                              |
| <b>iv) Perceived low awareness and inadequate knowledge on proper MHM including - use of modern materials, erratic blood flow, and inconsistent menstrual cycle</b> | 3                                   | 4       | 3        | 4        | <p>“Low awareness of proper MHM among some women” (<i>Intervention community Zieng, &lt;25 yrs FGD</i>)</p> <p>“Low awareness/inadequate knowledge of proper MHM among some women.” (<i>Control community Kokubila, &gt;25 yrs FGD</i>)</p> <p>“...soiling/staining ourselves with blood with embarrassments mostly because we could not calculate the menstrual days well.” (<i>Intervention community Asukorkor, &lt;25 yrs FGD</i>)</p> |
| <b>v) Lack of support from mothers</b>                                                                                                                              | 1                                   | 1       | 0        | 2        | <p>“... some mothers are disheartening, unaccommodating and unapproachable by their girls during menses” (<i>Intervention community Feyiase, &lt;25 yrs FGD</i>)</p> <p>“Mothers don’t support with the buying of sanitary pads and want us to adopt the olden days method of using rags/cloths, cotton etc to manage our menstrual blood flows” (<i>Control community Nsutam, &lt;25 FGD</i>)</p>                                         |
| <b>Menstrual Taboos, Stigma and Myths</b>                                                                                                                           |                                     |         |          |          |                                                                                                                                                                                                                                                                                                                                                                                                                                            |
| <b>i) Existence of menstrual stigma</b>                                                                                                                             | 3                                   | 6       | 4        | 5        | <p>“People distant themselves from you and/ or avoid you if you do not keep yourself neat during their menses because of smell/odour”. (<i>Intervention community Zieng, &gt;25 yrs FGD</i>)</p>                                                                                                                                                                                                                                           |
| <b>ii) Menstrual taboos in cultural practices</b>                                                                                                                   | 7                                   | 8       | 5        | 8        | <p>“... nowadays some old taboos and stigmas are relaxed except the religious ones like not touching the Quran or entering the mosque. E.g, a woman in her menses could not fetch water from the river or</p>                                                                                                                                                                                                                              |



| Main and sub themes                                 | Focus Groups Contributing to Themes |         |          |          | Some referenced quotes                                                                                                                                               |
|-----------------------------------------------------|-------------------------------------|---------|----------|----------|----------------------------------------------------------------------------------------------------------------------------------------------------------------------|
|                                                     | Intervention                        | Control | > 25 yrs | < 25 yrs |                                                                                                                                                                      |
| <b>among families/households</b>                    |                                     |         |          |          | stream nor even fetch water for the husband to drink or bath but now it is not so common in most homes.” ( <i>Intervention community Zieng, &lt;25 yrs FGD</i> )     |
| <b>iii) Menstrual taboos in religious practices</b> | 7                                   | 6       | 6        | 7        | “We are not allowed to pray as Muslims because we are considered not clean in our menses and tagged ....” ( <i>Intervention community Gbungbum, &lt;25 yrs FGD</i> ) |

## 189 **Sources of menstrual education**

190 Study participants cited that menstrual education were mostly spearheaded by females. The  
191 education sources included social institutions like families and friends, community neighbours,  
192 schools, health centres, churches etc (Table 2). Within the family, menstrual education was  
193 done by grandmothers, mothers, older female siblings, and other close relatives who had  
194 experienced menstruation themselves. Information from health centres in communities was  
195 mentioned to be useful especially on managing menstrual pains and maintaining personal  
196 hygiene. The findings were mostly collective responses and/ or similar experiences shared by  
197 individuals which were confirmed among group members.

198

199 Some participants disclosed the following:

200 *"My mother discussed it with me" "... my senior sister discussed it with me" (Participant, <25*  
201 *yrs FGD, Gbumbum)*

202

203 For some participants, MHM was learned by paying attention to the practices of older people  
204 as cited:

205

206 *"I learnt from siblings especially by observing my older sisters' practices" (Participant, <25*  
207 *yrs FGD, Feyiase).*

208

209 *"I learnt through attentive listening from one lady who mostly sent me to buy sanitary pads and*  
210 *cotton wool" (Participant, <25 yrs FGD, Nsutam).*

211

212 Interestingly, two young participants did not get the opportunity to learn from anyone  
213 especially an adult female relative but through their own personal experiences. One had lived  
214 with her father alone and recounted that her father was never informed about her menarche  
215 because she felt shy.

216

217 *"I was shy to tell my father when living alone with him as single parent" (Participant, <25 yrs*  
218 *FGD, Feyiase).*

219

220 *"I never had the opportunity to be taught by anyone close to me. I learnt it on my own in a hard*  
221 *way – I had to do something the first time and afterwards by personal experience." (Participant*  
222 *, <25 yrs FGD, Asukokor).*

223

224 Meanwhile, some responses indicated that transfer of MHM knowledge from adults to the  
225 young people was generally low and some mothers did not consciously share any menstrual  
226 information with their female wards.

227

228 *"Some of us have discussed MHM with our children but others have not because they believe*  
229 *or assume their children already know it, and they hide it from them." (Intervention community*  
230 *Asukokor, >25 yrs FGD)*

231

232 *"Attitude from some mothers is disheartening; they are unaccommodating and*  
233 *unapproachable by their daughters" (Intervention community Feyiase, <25 yrs FGD).*

234

235 *"Mothers don't support with the buying of sanitary pads and rather want us to adopt the olden*  
236 *days method of using rags/cloths, cotton wool etc. to manage our menstrual blood flows"*  
237 *(Control community Nsutam, <25 yrs FGD)*

238

239 *"We need to be supportive to our children (young girls) when in their menses" (Control*  
240 *community Tetekaso >25yrs FGD)*

241  
242 After the intervention, some participants indicated improvement in mothers relating well with  
243 their young girls, however some young participants did find any significant paradigm shift in  
244 communicating and/ or sharing menstrual management information from adult women. Some  
245 participants of the young FGD had these to say:

246  
247 *"We see our mothers holding books and making rounds, but they never reach us with any*  
248 *education or information. .... we see that the mothers only take their books when they hear that*  
249 *World Vision group is coming around." (Intervention community Feyiase <25 yrs FGD)*

250

### 251 ***Menstrual hygiene management challenges***

252 Study participants expressed several views across groups on their challenges during menstrual  
253 periods. However, the challenges raised were similar (Table 2), which included low awareness  
254 and access to modern MHM materials like sanitary pads, menstrual pains/cramps, lack of self-  
255 confidence during menses etc. MHM stigma and taboos existed as challenges but have been  
256 considered in the next section in details. Meanwhile, the incidence of the challenges were  
257 relatively pronounced in the control communities, and among the younger participants.

258

259 For control communities, participants were emphatic with the following challenges:

- 260 • low awareness and inadequate knowledge of proper MHM,
- 261 • erratic and inconsistent menstrual cycles,
- 262 • menstruation related health conditions like menstrual cramps/pains, diarrhoea, skin  
263 rashes etc meanwhile the related health issues are shrouded in secrecy and not  
264 discussed/talked about,
- 265 • high cost of MHM materials like sanitary pads,
- 266 • overuse of pain killers (e.g., cipro, paracetamol etc.),
- 267 • improvisation of toilet tissue paper instead; and
- 268 • lack of support from parents especially mothers in providing MHM materials, etc.

269

270 *"The challenge is how to manage menstrual cramps/pains but unfortunately people don't talk*  
271 *about it because it's considered a secret thing. ... challenges with menstrual cramps/pains but*  
272 *none talks about it as a shrouded secret thing" (Control community Naprisi FGDs)*

273

274 *"...my experience is frequent visits to the toilet – diarrhoea episodes when in I am in my*  
275 *menses." (Participant, Control community Nsutam, >25 yrs FGD).*

276

277 *"... severe menstrual pains and mostly depend on drugs for relief (e.g., cipro, paracetamol*  
278 *etc), ... and associated diarrhoea episodes with our periods." (Control community Nsutam,*  
279 *>25 yrs FGD)*

280

281 *"Mothers don't support with the buying of sanitary pads and want us to adopt the olden days*  
282 *method of using rags/cloths, cotton etc to manage our menstrual blood flows" (Participant,*  
283 *control community Nsutam, <25 FGD)*

284

285 For intervention communities, the following were the MHM challenges:

- 286 • Low awareness and access to modern MHM practices including materials like sanitary  
287 pads although some are uncomfortable to use,

- 288 • Menstrual pains/cramps and headaches including bodily weaknesses and associated  
289 illnesses,  
290 • Lack of self-confidence during menses,  
291 • Erratic blood flow and inability to predict menstrual cycle which may come with public  
292 embarrassment when stained with blood, and  
293 • Inadequate parental support to young females on MHM, etc.

294  
295 *“Getting access to a sanitary pad is challenging. Pad is not sold in our village, so we have to*  
296 *travel to a nearby town to get one.” (Intervention community Gbumgbum, <25yrs FGD)*  
297

298 *“We largely depend on rags (used cloth pieces) as improvised menstrual pads which were not*  
299 *able to function well especially during heavy flow menses and you could get yourself*  
300 *soiled/stained.” (Intervention community Zieng, >25 yrs FGD)*  
301

302 *“...menstrual pains and headaches are common with young girls in this community during*  
303 *menstrual periods.” (Intervention community Feyiase, <25 yrs FGD).*  
304

305 *“...soiling/staining ourselves with blood with embarrassments mostly because we could not*  
306 *calculate the menstrual days well.” (Intervention community Asukorkor, <25 yrs FGD).*  
307

308 The older group were much particular about menstrual pains challenges and their inability to  
309 manage the situation nor get any support from anywhere. Frustrations were worsened by stress  
310 and depressions associated with menstrual cramps crises combined with over-burdened  
311 domestic chores. These negatively affected self-esteem and confidence to meet public  
312 expectation.  
313

314 *“...how to behave comfortably in public during menstruation.” (Participant, >25 yrs FGD*  
315 *Gbumbum).*  
316

317 *“... any challenges are hardly talked about, if any at all, except menstrual pains.” (Intervention*  
318 *community Asukokor, >25 yrs FGD ).*  
319

320 *“Sometimes the menstrual period changes, and you may miss the timing, which could lead to*  
321 *emergency blood stains in public with embarrassment. Mostly this happens when we are not*  
322 *able to do the calculations well.” (Intervention community Asukokor, < 25 yrs FGD).*  
323

324 Aside these challenges, young participants in the intervention communities expressed their  
325 dissatisfaction with the attitudes of their immediate family members towards them including  
326 mothers. Also, some mothers had pushed their daughters to use improvised MHM materials  
327 like rags and tissue papers other than modern sanitary pads.  
328

329 *“...the attitude from some mothers is not good, they are unaccommodating and*  
330 *unapproachable by their daughters.” (Intervention community Feyiase, <25 yrs FGD)*  
331

### 332 ***MHM Taboos and Stigma***

333 Menstruation associated taboos and stigma were driven by religious beliefs, traditions, lapses  
334 in personal hygiene practices of victims, and to some extent exposure to modernization.  
335 Menstrual taboos and stigma were similar across communities irrespective of the demographic  
336 differences (north versus south, and young versus old). Thus, in Savelugu (northern Ghana)

337 with dominant Muslim communities, restricting women in menses from religious activities like  
338 joining congregational prayers and/ or attending worship at the mosque, contacts with and/ or  
339 serving males (e.g. husbands, fathers etc) in homes were no different from similar practices in  
340 the Sekyere East (southern Ghana) where same exclusion was reported with spiritual churches,  
341 shrines and fetish priests, contacting and/ or serving males/husbands, visiting some  
342 rivers/streams etc.

343  
344 FGD participants from the north shared their views as follows:

345  
346 *"We women are not allowed to pray as Muslims at the mosque because we are considered*  
347 *unclean during our menstrual periods"* (Intervention community Gbumbum, >25 yrs FGD).

348  
349 *"... women in menses could not touch the Holy Quran and could not join prayers at the mosque*  
350 *too because they are considered unclean at that time."* (Intervention community Zieng, <25  
351 yrs FGD)

352  
353 *"... women can't have sexual intercourse or any intimacy with partners during our periods."*  
354 *(Intervention community Gbumbum, >25 yrs FGD).*

355  
356 *"We are not allowed to pray and do not have sexual intimacy with our partners."* (Intervention  
357 community Kukobila, >25 yrs FGD).

358  
359 In the southern communities of Sekyere East, some experiences were as follows:

360  
361 *"... women cannot go to a fetish priests' houses or shrines in their menses, even very daring*  
362 *to pass by such houses/shrines or greeting them."* (Intervention community Feyiase, <25 yrs  
363 FGD)

364  
365 *"Some churches don't allow you to come to church, especially the spiritual*  
366 *churches/movements."* (Intervention community Asukokor, <25 yrs FGD)

367  
368 *"... we do not cook nor hold/touch our father's food."* (Intervention community Asukokor, <25  
369 yrs FGD).

370  
371 *"You dare not cook for your father nor touch his drinking cup."* (Control community Tetekaso,  
372 <25 yrs FGD).

373  
374 The older participants expressed worry that menstruation taboos affected female lifestyle  
375 including domestic chores, for instance, inability to fetch water, cook and serve food to their  
376 husbands and male household members, visit certain farmlands, nor commuting over  
377 rivers/streams for socioeconomic ventures etc. Some menstrual taboos could be extensive  
378 barriers including restrictions on commuting the only available route of riverine transport.

379  
380 *"... we are not allowed to fetch water from the dam."* (Control community Kukobila, <25 yrs  
381 FGD).

382  
383 *"...you don't cross certain rivers nor attempt to access or fetch water from such rivers in the*  
384 *community."* (Intervention community Feyiase, <25 yrs FGD).

385

386 “...you don’t have to commute across certain rivers in the community, including going to farms  
387 and markets.” (Intervention community Asukokor, >25 yrs FGD).

388  
389 Some menstrual taboos were observed because of the belief in the dire repercussions on women  
390 who flout them. In both Savelugu and Sekyere East, some participants shared their personal  
391 experience to consolidate the fear of menstrual taboos, citing consequences such as prolonged  
392 and/ or heavy flow menses.

393  
394 “... I bled continuously for almost two weeks after I crossed that river down the community to  
395 my farm, although I didn’t know about the taboo” (Participant, Intervention community  
396 Asukokor, >25 yrs FGD).

397  
398 “The taboo is real, and some of us have suffered the consequence before, that if you defiled it  
399 you experience protracted menstrual periods for several days to weeks.” (Control community  
400 Kukobila, >25 yrs FGD).

401  
402 On menstrual stigma, some participants cited that teasing by boys in schools was common  
403 although culprits were liable to punishments when reported to school authorities to prevent  
404 such stigmatization.

405  
406 “When a girl stains herself in school, they may call her names, especially by the boys, saying  
407 Osmo! Osmo! Stigmatization may happen only at school, especially when you soil yourself with  
408 blood stain – this normally comes from the boys, although they could be punished when it is  
409 reported to school authorities.” (Control community Nsutam, <25 yrs FGD)

410  
411 Although, adults were not subjected to menstrual stigmatization, they recalled experience  
412 including schooldays, confirming the long-persisted ordeal in communities.

413  
414 “Stigmatization was common at school in those days when you got your dress stained.”  
415 (Control community Nsutam, >25 yrs FGD)

416  
417 “People distant themselves from you ....during their menses because of smell/odour.”  
418 (Intervention community Zieng, >25 yrs FGD)

419

## 420 **Behavioural changes to MHM Promotion**

421 For control communities, information and education on MHM came from sources other than  
422 the NCG intervention and focused on use of modern sanitary pads, improved personal hygiene  
423 practices, and supporting others especially young females.

424  
425 The key messages from Savelugu control communities were:

- 426 ✓ Using modern sanitary pads, appropriate pad usage practices, and improved personal  
427 hygiene like regular bathing – at least twice a day.
- 428 ✓ Stop taking family planning pills during menstrual periods for effective monitoring of  
429 menstrual cycle.

430  
431 “Previously we could use one sanitary pad the whole day, but now we change pads at the right  
432 time. You can get infections and sores from using one sanitary pad for a long time.” (Control  
433 community Naprisi, <25 yrs FGD)

434

435 “... we have not changed anything much except using modern pads for improved personal  
436 hygiene.” (Control community Kukobila, >25 yrs FGD)

437

438 Likewise, participants from Sekyere East control communities shared the following:

- 439 ✓ Preparing in advance towards menstrual episodes for safe MHM
- 440 ✓ Foreknowledge that alternative MHM materials like clean fabric other than sanitary  
441 pads could be used especially when properly washed, dried and pressed before reuse.
- 442 ✓ Supporting young girls on MHM through education

443

444 “For us who improvise the use of cloth as pads, we wash the materials and iron it neatly before  
445 reuse and it has helped a lot especially when you have no money to buy sanitary pads.”  
446 (Control community Nsutam, >25 yrs FGD)

447

448 For the intervention communities, the list of behaviour change practices was relatively  
449 exhaustive likely due to additional understanding from the pilot project sensitization. However,  
450 the improved behaviour changes did not include taboos but practices that could break or avert  
451 stigmatization linked to personal behaviour and hygiene practices.

452

453 Most participants were of the view that menstruation taboos existed but were not as stringent  
454 as in earlier generations in some places likely due to modernization and some religious beliefs  
455 contradicting traditional and cultural beliefs and practices.

456

457 Key improved behaviour change identified from the Savelugu intervention communities were:

- 458 ✓ Able to use sanitary pads now and episode of menstruations may go unnoticed by any  
459 third party. There has been a drastic changed from using old cloth (rags) as sanitary  
460 pads to a reusable fabric or disposable sanitary pads with improved hygienic practices  
461 such as regular changes and bathing.
- 462 ✓ Keeping oneself away from sexual intercourse to avoid unwanted (teenage) pregnancy.
- 463 ✓ Improved personal hygiene practices including washing of cloths, underwear, reusable  
464 pads etc and drying in the sunlight.
- 465 ✓ Inferiority complex that menstruating women were not clean enough to mingle with  
466 others are dispelled to the barest minimum. With improved hygiene practices a  
467 menstruating woman can have her normal life like any other person.
- 468 ✓ Improvement in making advanced preparation towards menses period including  
469 educating other younger women on MHM.

470

471 Key improved behaviour change identified from Sekyere intervention communities were:

- 472 ✓ Disposal of used sanitary pads is no more a nuisance, improved management of used  
473 MHM materials. Keeping used menstrual pads safe (by burying, burning and/ or  
474 dropping into toilet) from recent ritualists who scout for them for “ritual or blood  
475 money”.
- 476 ✓ Educating and monitoring our children especially the girl child to provide the needed  
477 support on MHM. Some of us now relate well with our young girls share their concerns  
478 and support them during the menstrual periods.
- 479 ✓ Schoolgirls are now able to manage themselves well without soiling themselves during  
480 menstrual periods.

481

482 “Now most women wrap used sanitary pads in polythene bags and dispose into toilet or burn  
483 them. This practice has been helpful because you hardly see used pads in the streets of the

484 *community especially where you could find dogs littering/dragging/running them around.”*  
485 *(Intervention community Asukorkor, >25 yrs FGD)*

486  
487 *“We still hear of taboos but are not as religious as they used to be some years back, especially*  
488 *in the olden days.” (Intervention community Feyiase, >25 yrs FGD)*  
489

490 On the taboos, some were becoming unpopular. For instance, of not crossing certain rivers in  
491 the community during menstruating has become unpopular in recent times. The change were  
492 attributed to modernism influencing some beliefs regarding menstrual hygiene, and the  
493 observation did not appear much different between the northern and southern communities.  
494

495 One of the groups in Savelugu was quoted:  
496

497 *“... nowadays some old taboos and stigmas are relaxed except the religious ones like not*  
498 *touching the Quran or not entering the mosque. For instance, a woman in her menses could*  
499 *not fetch water from the river or stream and even fetch water for her husband to drink or bath,*  
500 *but now it is not so in most homes.” (Intervention community Zieng, <25 yrs FGD).*  
501

502 In the Sekyere East communities, menstrual taboos were said to be merely ceremonial - some  
503 people take them lightly in recent times including worshippers of strict church sects because  
504 the modern lifestyle of using sanitary pads could conceal any hint menstruation.  
505

506 *“... many people menstruate and go to church without the leaders being aware because of the*  
507 *use of modern sanitary pads.” (Intervention community Asukorkor, >25 yrs FGD).*  
508

509 *“We think some taboos are watered down by modernization, especially because of improved*  
510 *and safe MHM practices of modern life and educational promotion.” (Intervention community*  
511 *Feyiase, >25 yrs FGD).*  
512

513 *“....some church beliefs and modernisation have relaxed some menstrual taboos and stigma.*  
514 *...women in their menses could not go to farm to defile the land or soil but nowadays it is not*  
515 *like that.” (Control community Naprisi, >25 yrs FGD).*  
516

517 In addition to awareness promotion from the intervention, some other factors contributed to the  
518 improved MHM practices among intervention communities such as provision of school toilet  
519 facilities with changing rooms by the intervention, improved knowledge of MHM among  
520 schoolgirls, supply of MHM materials to schools by NGOs etc.  
521

522 Savelugu communities shared experiences from intervention and other sources:

- 523 ✓ Improvement in the usage of sanitary pads including changing regularly due to  
524 MHM education.
- 525 ✓ Schools have made provisions for changing rooms for girls. E.g. improvising a  
526 room in the school computer lab as changing room where possible.
- 527 ✓ In homes, bathrooms could now be used as changing rooms during  
528 menstruation without stigmatization.
- 529 ✓ MHM materials like sanitary pads were made available to schoolgirls by some  
530 NGOs.
- 531 ✓ Schoolgirls learn MHM from their teachers.
- 532 ✓ Practiced safe disposal of wastewater from washed menstrual pads (fabrics)  
533 unlike hitherto open disposal.



534  
535  
536  
537  
538  
539  
540  
541  
542  
543  
544  
545  
546  
547  
548  
549  
550  
551  
552  
553  
554  
555  
556  
557  
558  
559  
560  
561  
562  
563  
564  
565  
566  
567

Sekyere East communities shared experiences from intervention and other sources:

- ✓ Improvement in the toilet facilities in schools where girls could access changing rooms.
- ✓ Schoolgirls showed improved knowledge on proper MHM practices and hardly soiled themselves with menstrual blood.
- ✓ Some latrines with urinals and changing rooms have been provided at schools by World Vision to support children especially the schoolgirls.
- ✓ Improvement in mother-daughter relationship especially to provide support on proper MHM.

Some of the quotations from FGDs are cited as follows:

*“Toilet and urinals in schools were provided by World Vision to ensure privacy especially in MHM to support schoolgirls ....” (Intervention community Feyiase, <25yrs & >25yrs FGDs)*

*“We have changed from using old cloth as sanitary pad to using reusable and/ or disposable sanitary pads. We did not know how to use the pads properly .....we were bathing only in the evenings but now we bath 3 times daily during menstruation.” (Intervention community Gbumbum, <25 yrs FGD).*

*“Schoolgirls are now able to manage themselves well without soiling themselves during menstrual periods. Improved awareness, knowledge, and behaviour in that regard has been helpful.” (Intervention community Asukokor, <25 yrs FGD).*

*“Previously wastewater from washed pads(cloths) was disposed of in the open, but now it is disposed of in a pit. Clothes, underwear, and reusable pads were washed and dried in our rooms, but now we have been educated to dry them in the sun.” (Intervention community Gbumbum, >25 yrs FGD)*

*“We support by educating and monitoring our young girls on MHM. Some of us now have cordial relationships with them to share and support their menstrual issues together.” (Intervention community Feyiase, >25yrs FGD).*

#### 4 Discussions

The sources of education and/ or awareness about safe menstrual hygiene management for study participants were mainly from relatives and friends across all groups – young and old, intervention and control communities. This is consistent with other studies indicating the significant role mothers and close relatives (e.g., older sisters and grandmothers) play as primary source of information on menstruation (17, 32), although such information sources may be inadequate (33). Moreover, this was complemented by support from public institutions like schools, churches, health facilities etc and NGOs (except for control communities). Control communities could not have received adequate MHM education from NGOs because MHM interventions at the community level are usually neglected even in WASH projects (34), unlike in schools. The contributions from NGOs, public and social institutions including local government authorities are relevant as recounted in other studies (35, 36). In Ghana, school authorities educate pupils on MHM under the supervision of School Health Education Program (SHEP), and communities are supported by health centres under Ministry of Health (37, 38).

583 The main challenges with MHM in the study communities are similar to those known in  
584 literature – lack of access and high cost of MHM materials (e.g., disposal sanitary pads), burden  
585 of menstrual pains (cramps), low awareness and inadequate knowledge on MHM among local  
586 women, and the feeling from young women that mothers do not provide adequate support  
587 MHM (39-41). The contrast is in the low incidence of the first two reported challenges among  
588 intervention than control communities. This could be attributed partly to better exposure to the  
589 knowledge of using modern sanitary materials from MHM intervention and other factors like  
590 inability to afford sanitary pads especially among the young women, lack of readily access to  
591 service etc. (36). The intervention communities were exposed to improved ways of managing  
592 menstrual periods including empowering them with skills to sew reusable pads from fabrics,  
593 yet, the preference for modern disposable pads was high likely due to repulsion to the burden  
594 of washing and reuse (42). Lack of affordability especially among young women undermines  
595 MHM support from parents or guardians in communities which could be linked to menstrual  
596 period poverty – where access to MHM materials becomes an unmet need (36, 43). The older  
597 women have become used to reusable menstrual pads (fabrics) and therefore are less worried  
598 about the cost of sanitary pads. Clearly several challenges exist among menstruating women  
599 yet limited platforms exist for them to voice out, even inadequate avenues at the household and  
600 community levels (33, 44).

601  
602 Menstrual stigma marginally exists in communities, with about twice prevalence rate among  
603 control than intervention communities, yet no clear difference exists between the young and  
604 older women groups. Probably every woman might have had first-hand and/ or a colleague’s  
605 bitter experience including deep-seated internalised experience and perception (33). The NCG  
606 approach like other targeted behaviour change interventions could have partly contributed to  
607 the minimized menstrual stigma in the intervention communities (35). However, menstrual  
608 taboos are strongly felt in cultural (traditional) and religious beliefs and practices across all  
609 communities and not any significant difference exist between the intervention and control  
610 communities. Almost every discussant irrespective of the district (geographical location),  
611 community, religion and culture accepted that menstrual taboos strongly persist in their  
612 communities especially restrictions related to religio-cultural beliefs and practices (45). The  
613 intervention could barely bring any improvement in this regard, likely because religio-cultural  
614 practices are complex, mostly sensitive, and may require more time and integrated approaches  
615 including rigorous active engagement with stakeholders (key leaders – community, religious  
616 groups, etc.) (35, 46). The expected approach to this complex issue is working with and not  
617 directly against/opposing existing socio-cultural beliefs and practices including menstruation-  
618 related myths and denial, and religious restrictions (46) across major belief systems like  
619 Christianity, Islam and Traditional Beliefs (45).

620  
621 Existing menstrual restrictions (because of taboos) plus other factors affected household  
622 practices such as exemption of menstruators from helping with house chores e.g., cooking,  
623 fetching water, serving males etc; restricted sexual intimacy, and even making appearances at  
624 social gatherings. The sentiments about these issues are more pronounced in Savelugu (north  
625 – Muslims and traditionalist) than Sekyere (south – Christians and traditionalist) communities  
626 likely because of differences in religio-cultural settings. This is consistent with a similar study  
627 conducted in a neighbouring district with similar demographics in the north (17), considered  
628 as characteristics among predominant Islamic communities in the Sub-Saharan region (16).  
629 Sekyere East communities have some menstrual restrictions and taboos relaxed due to  
630 modernization and increased in church beliefs. Some participants see menstrual taboos as  
631 outmoded practices and yet believe in the “spiritual” repercussions with the ordeal individuals’  
632 go through like protracted menstrual episode even if one ignorantly flouted certain mystified

633 menstrual taboos. For the traditionalist, the belief of mystical ability of menstrual blood to  
634 deactivate charms and spiritual powers exist and such taboos must continue (37).

635  
636 In these communities, the fear of taboos may continue to exist without scientific proof of the  
637 associated consequences although such occurrences are possible (47). Yet, interventions could  
638 take opportunities in the decreasing significance of menstrual myths with associated taboos  
639 and stigma due to improvement in knowledge and modernization, and this is consistent with  
640 other taboos (48). For instance, restrictions on sexual intercourse may come with benefits and  
641 could contextualised with scientific knowledge to disabuse the traditional dogma.  
642 Scientifically, such restrictions could be averting the spread sexually transmitted diseases that  
643 are implicated in unprotected sex during menses time (49). Communities should be opened to  
644 discussions on the consequences of menstrual taboos which often lead to internalised secrecy,  
645 shame, decreased mobility, inequity, and negative impact on confidence and self-efficacy of  
646 women (36, 50).

647  
648 Episodes of menstrual cramps are common challenges all women groups face and almost  
649 everyone manages the condition by self-medication through the use pain relief drugs like  
650 paracetamol, ciprofloxacin etc. similar to other studies (51). Also, some participants especially  
651 from control communities claim using antibiotics to numb menstrual pains and avert infections.  
652 Minority of women also rely on traditional herbal concoctions as painkillers and/ or treatment.  
653 Clearly, menstruators could be abusing drugs out of misinformation and self-medication, a  
654 common practice recorded in literature (14), and this could be contributing to the high  
655 prevalence of self-medication among Ghanaians (52).

656  
657 MHM experience and lessons learned are pronounced among intervention than control  
658 communities as expected due to extra information, resource materials and support from the  
659 project implementation other than the common awareness and promotion activities in  
660 communities. The common MHM awareness are typically focused on personal hygiene  
661 practices, safe use of sanitary pads, pre-preparations towards menstrual cycles, etc. (22). NCG  
662 communities' improved exposure could added rich experience narrative such as: better MHM  
663 hygiene practices (e.g., bathing at least thrice daily, regular changing of pads, etc.), producing  
664 reuseable sanitary pads from fabrics, improvement in self-confidence, safe disposal of  
665 wastewater and used MHM materials, improvement in supporting younger women (daughters  
666 and sisters), paying much attention to MHM issues etc. Thus, interventions that empower  
667 women through improved knowledge and understanding are capable of influencing positive  
668 attitude and behaviour change practices (53), including innovation, self-confidence and  
669 efficacy, reducing anxiety and dispelling negative psychosocial attributes (22).

670

## 671 **Conclusions**

672 There is a satisfactory level of menstrual hygiene management awareness and practices among  
673 females (young and old) in the study areas. Women in communities receive menstrual hygiene  
674 management awareness and education from varied sources including relatives and friends,  
675 NGOs, public and social institutions like health centres, churches, schools etc. NCG approach  
676 intervention consciously improved beneficiaries understanding of safe MHM practices. Some  
677 MHM challenges persist such as lack of readily access to MHM materials due to non-  
678 availability and non-affordability, burden of managing menstrual pains and illnesses, and  
679 menstrual taboos. Yet, it appears the intervention is successful in bringing out the key unspoken  
680 MHM challenges in attempt to seek solutions although they are beyond the project scope and  
681 design. Most of the MHM challenges are systemic and/ or institutionalised rather than personal

682 behaviour, even going beyond a single community. Menstrual stigma is comparatively very  
683 low and sometimes not recognized in some communities unlike the prevalence of menstrual  
684 taboos which are prominent across all communities (control and interventions). Menstrual  
685 taboos are directly linked to religious and superstitious beliefs while stigma could be triggered  
686 largely by a victim's inappropriate behaviour and/ or poor personal hygiene practices.  
687 Championing local production and use of reusable menstrual pads from fabrics is an excellent  
688 intervention by the NCG project especially for women who could not afford commercial  
689 sanitary pads. It is recommended that MHM interventions should have enough scope and time  
690 to work directly with institutions and stakeholders especially those who have influence to  
691 facilitate long-term change processes like menstrual taboos with religio-cultural roots in local  
692 communities.

693

#### 694 **Conflict of interest**

695 Authors declare no competing interest.

696

#### 697 **Acknowledgement**

698 Authors appreciate the enormous support from World Vision US for funding this research  
699 work, and the National Team, especially the Area Program Offices in the Sekyere East District  
700 and Savelugu Municipal Assemblies particularly Rachel, Georgina, and Felix and our field  
701 assistants Timothy, Gideon, and Clement.

702

#### 703 **References**

- 704 1. Sommer M, Chandraratna S, Cavill S, Mahon T, Phillips-Howard P. Managing  
705 menstruation in the workplace: an overlooked issue in low- and middle-income countries. *Int*  
706 *J Equity Health*. 2016;15:86.
- 707 2. Montgomery P, Ryus CR, Dolan CS, Dopson S, Scott LM. Sanitary pad interventions  
708 for girls' education in Ghana: a pilot study. *PloS one*. 2012;7(10):e48274.
- 709 3. Oruko K, Nyothach E, Zielinski-Gutierrez E, Mason L, Alexander K, Vulule J, et al.  
710 'He is the one who is providing you with everything so whatever he says is what you do': A  
711 Qualitative Study on Factors Affecting Secondary Schoolgirls' Dropout in Rural Western  
712 Kenya. *PloS one*. 2015;10(12):e0144321.
- 713 4. Rossouw L, Ross H. Understanding Period Poverty: Socio-Economic Inequalities in  
714 Menstrual Hygiene Management in Eight Low- and Middle-Income Countries. *International*  
715 *journal of environmental research and public health*. 2021;18(2571).
- 716 5. Maqbool R, Maqbool M, Zehravi M, Ara I. Menstrual distress in females of  
717 reproductive age: a literature review. *Int J Adolesc Med Health*. 2021;34(2):11-7.
- 718 6. WHO/UNICEF. Menstrual Health: WHO-UNICEF JMP; 2024 [Available from:  
719 <https://washdata.org/monitoring/menstrual-health>
- 720 7. Sychareun V, Chaleunvong K, Essink DR, Phommavongsa P, Durham J. Menstruation  
721 practice among school and out-of-school adolescent girls, Lao PDR. *Global health action*.  
722 2020;13(sup2):1785170.
- 723 8. MacLean K, Hearle C, Ruwanpura KN. Stigma of staining? Negotiating menstrual  
724 taboos amongst young women in Kenya. *Women's Studies International Forum*. 2020;78.
- 725 9. Patkar A. Policy and Practice Pathways to Addressing Menstrual Stigma and  
726 Discrimination. In: Bobel C, Winkler IT, Fahs B, Hasson KA, Kissling EA, Roberts TA,  
727 editors. *The Palgrave Handbook of Critical Menstruation Studies*. Singapore2020. p. 485-509.
- 728 10. Mahon T, Fernandes M. Menstrual hygiene in South Asia: a neglected issue for WASH  
729 (water, sanitation and hygiene) programmes. *Gender & Development*. 2010;18(1):99-113.

- 730 11. Joshi S, Acharya Y. Women's extreme seclusion during menstruation and children's  
731 health in Nepal. *PLOS Glob Public Health*. 2022;2(7):e0000355.
- 732 12. Robinson HJ, Barrington DJ. Drivers of menstrual material disposal and washing  
733 practices: A systematic review. *PloS one*. 2021;16(12):e0260472.
- 734 13. Agyekum K. Menstruation as a Verbal Taboo among the Akan of Ghana. *Journal of*  
735 *Anthropological Research*. 2002;58(3):367-87.
- 736 14. Armour M, Parry K, Al-Dabbas MA, Curry C, Holmes K, MacMillan F, et al. Self-care  
737 strategies and sources of knowledge on menstruation in 12,526 young women with  
738 dysmenorrhea: A systematic review and meta-analysis. *PloS one*. 2019;14(7):e0220103.
- 739 15. Rubinsky V, Gunning JN, Cooke-Jackson A. "I Thought I Was Dying:" (Un)Supportive  
740 Communication Surrounding Early Menstruation Experiences. *Health Commun*.  
741 2020;35(2):242-52.
- 742 16. Shah V, Nabwera HM, Sosseh F, Jallow Y, Comma E, Keita O, et al. A rite of passage:  
743 a mixed methodology study about knowledge, perceptions and practices of menstrual hygiene  
744 management in rural Gambia. *BMC public health*. 2019;19(277).
- 745 17. Mohammed S, Larsen-Reindorf RE. Menstrual knowledge, sociocultural restrictions,  
746 and barriers to menstrual hygiene management in Ghana: Evidence from a multi-method  
747 survey among adolescent schoolgirls and schoolboys. *PloS one*. 2020;15(10):e0241106.
- 748 18. Benshaul-Tolonen A, Aguilar-Gomez S, Heller Batzer N, Cai R, Nyanza EC. Period  
749 teasing, stigma and knowledge: A survey of adolescent boys and girls in Northern Tanzania.  
750 *PloS one*. 2020;15(10):e0239914.
- 751 19. Miiro G, Rutakumwa R, Nakiyingi-Miiro J, Nakuya K, Musoke S, Namakula J, et al.  
752 Menstrual health and school absenteeism  
753 among adolescent girls in Uganda  
754 (MENISCUS): a feasibility study. *BMC Women's Health*. 2018;18(4).
- 755 20. McHenga J, Phuma-Ngaiyaye E, Kasulo V. Do sanitation facilities in primary and  
756 secondary schools address Menstrual Hygiene needs? A study from Mzuzu City, Malawi.  
757 *Physics and Chemistry of the Earth, Parts A/B/C*. 2020;115.
- 758 21. Campbell R, Freeman O, Gannon V. From overt threat to invisible presence: discursive  
759 shifts in representations of gender in menstrual product advertising. *Journal of Marketing*  
760 *Management*. 2021;37(3-4):216-37.
- 761 22. Hennegan J, Montgomery P. Do menstrual hygiene management interventions improve  
762 education and psychosocial outcomes for women and girls in low and middle income  
763 countries? A systematic review. *PloS one*. 2016;11(2):e0146985.
- 764 23. Dwumfour-Asare B, Appiah-Effah E, Nyarko KB, Tidwell JB. Understanding the  
765 suitability of Nurturing Care Group approach to improving animal faeces management in  
766 Ghana. *Research Square*. 2024;24 September 2024, PREPRINT (Version 1).
- 767 24. WV, World Vision. Nurturing Care Groups Project Model. *Health and Nutrition*  
768 *Technical Brief* [Internet]. 2020 January 3, 2022. Available from:  
769 [https://www.wvi.org/sites/default/files/2020-](https://www.wvi.org/sites/default/files/2020-06/Nurturing%20Care%20Groups%20CPM%20Brief%20June%202020.pdf)  
770 [06/Nurturing%20Care%20Groups%20CPM%20Brief%20June%202020.pdf](https://www.wvi.org/sites/default/files/2020-06/Nurturing%20Care%20Groups%20CPM%20Brief%20June%202020.pdf).
- 771 25. Borger S, Davis T. *Nurturing Care Groups: A Training Manual for Program Design and*  
772 *Implementation*. USA: World Vision International & Hesperian Health Guides; 2019.
- 773 26. Fine MA, Kurdek LA. Publishing multiple journal articles from a single data set: Issues  
774 and recommendations. *Journal of Family Psychology*. 1994;8(4):371-9.
- 775 27. GSS, Ghana Statistical Service. *District Analytical Report: Savelugu-Nanton District*.  
776 *Accra, Ghana: Ghana Statistical Service; 2014*.
- 777 28. GSS, Ghana Statistical Service. *2010 PHC District Analytical Report: Sekyere East*  
778 *District. Accra, Ghana: Ghana Statistical Service; 2014*.

- 779 29. Barker F, Atkins L, de Lusignan S. Applying the COM-B behaviour model and  
780 behaviour change wheel to develop an intervention to improve hearing-aid use in adult auditory  
781 rehabilitation. *Int J Audiol.* 2016;55 Suppl 3:S90-8.
- 782 30. Antwi-Agyei P, Dwumfour-Asare B, Amaning Adjei K, Kweyu R, Simiyu S.  
783 Understanding the Barriers and Opportunities for Effective Management of Shared Sanitation  
784 in Low-Income Settlements—The Case of Kumasi, Ghana. *International journal of*  
785 *environmental research and public health.* 2020;17(12):4528.
- 786 31. Onwuegbuzie AJ, Dickinson WB, Leech NL, Zoran AG. A Qualitative Framework for  
787 Collecting and Analyzing Data in Focus Group Research. *International Journal of Qualitative*  
788 *Methods.* 2009;8(3):[Online].
- 789 32. Holmes K, Curry C, Sherry, Ferfolja T, Parry K, Smith C, et al. Adolescent Menstrual  
790 Health Literacy in Low, Middle and High-Income Countries: A Narrative Review.  
791 *International Journal of*  
792 *Environmental Research and Public Health.* 2021;18(2260).
- 793 33. Plesons M, Patkar A, Babb J, Balapitiya A, Carson F, Caruso BA, et al. The state of  
794 adolescent menstrual  
795 health in low- and middle-income countries and suggestions for future action and research.  
796 *Reproductive Health.* 2021;18(31).
- 797 34. Asimah SA, Diabene PY, Wellington SNL. Menstrual hygiene management in Ghana:  
798 understanding the socio-cultural, economic, political factors, challenges and opportunities.  
799 40th WEDC International Conference; Loughborough, UK: WEDC, , Loughborough  
800 University; 2017.
- 801 35. Kansime C, Hytti L, Nalugya R, Nakuya K, Namirembe P, Nakalema S, et al.  
802 Menstrual health intervention and school attendance in Uganda (MENISCUS-2): a pilot  
803 intervention study. *BMJ open.* 2020;10(e031182).
- 804 36. Hennegan J, Shannon AK, Rubli J, Schwab KJ, Melendez-Torres GJ. Women's and  
805 girls' experiences of menstruation in low- and middle-income countries: A systematic review  
806 and qualitative metasynthesis. *PLoS Med.* 2019;16(5):e1002803.
- 807 37. Kpodo L, Aberese-Ako M, Axame WK, Adjuik M, Gyapong M. Socio-cultural factors  
808 associated with knowledge, attitudes and menstrual hygiene practices among Junior High  
809 School adolescent girls in the Kpando district of Ghana: A mixed method study. *PloS one.*  
810 2022;17(10):e0275583.
- 811 38. Rheinländer T, Gyapong M, Akpakli DE, Konradsen F. Secrets, shame and discipline:  
812 School girls' experiences of sanitation and menstrual hygiene management in a peri-urban  
813 community in Ghana. *Health care for women international.* 2019;40(1):13-32.
- 814 39. Kashyap V, Choudhari SG. Menstrual Hygiene Problems and Challenges Faced by  
815 Adolescent Females in Rural Areas: A Narrative Review. *Cureus.* 2023;15(6):e40438.
- 816 40. Kaur R, Kaur K, Kaur R. Menstrual Hygiene, Management, and Waste Disposal:  
817 Practices and Challenges Faced by Girls/Women of Developing Countries. *Journal of*  
818 *Environmental and Public Health.* 2018;2018(Article ID 1730964).
- 819 41. McCammon E, Bansal S, Hebert LE, Yan S, Menendez A, Gilliam M. Exploring young  
820 women's menstruation-related challenges in Uttar Pradesh, India, using the socio-ecological  
821 framework. *Sex Reprod Health Matters.* 2020;28(1):1749342.
- 822 42. van Eijk AM, Jayasinghe N, Zulaika G, Mason L, Sivakami M, Unger HW, et al.  
823 Exploring menstrual products: A systematic review and meta-analysis of reusable menstrual  
824 pads for public health internationally. *PloS one.* 2021;16(9):e0257610.
- 825 43. Boyers M, Garikipati S, Biggane A, Douglas E, Hawkes N, Kiely C, et al. Period  
826 poverty: The perceptions and experiences of impoverished women living in an inner-city area  
827 of Northwest England. *PloS one.* 2022;17(7):e0269341.

- 828 44. Rheinlander T, Gyapong M, Akpakli DE, Konradsen F. Secrets, shame and discipline:  
829 School girls' experiences of sanitation and menstrual hygiene management in a peri-urban  
830 community in Ghana. *Health care for women international*. 2019;40(1):13-32.
- 831 45. Barrington DJ, Robinson HJ, Wilson E, Hennegan J. Experiences of menstruation in  
832 high income countries: A systematic review, qualitative evidence synthesis and comparison to  
833 low- and middle-income countries. *PloS one*. 2021;16(7):e0255001.
- 834 46. Thapa S, Aro AR. 'Menstruation means impurity': multilevel interventions are needed  
835 to break the menstrual taboo in Nepal. *BMC Women's Health*. 2021;21(84).
- 836 47. García-Montes JM, Álvarez MP, Sass LA, Cangas AJ. The Role of Superstition in  
837 Psychopathology. *Philosophy, Psychiatry, & Psychology*. 2009;15(3):227-37.
- 838 48. Osei-Tutu P. Taboos as informal institutions of local resource management in Ghana:  
839 Why they are complied with or not. *Forest Policy and Economics*. 2017;85:114-23.
- 840 49. Hensel DJ, Tanner AE, Sherrow A, Fortenberry JD. A longitudinal daily diary analysis  
841 of condom use during bleeding-associated vaginal sex among adolescent females. *Sex Transm  
842 Infect*. 2016;92(5):337-9.
- 843 50. MacRae ER, Clasen T, Dasmohapatra M, Caruso BA. 'It's like a burden on the head':  
844 Redefining adequate menstrual hygiene management throughout women's varied life stages in  
845 Odisha, India. *PloS one*. 2019;14(8):e0220114.
- 846 51. Femi-Agboola DM, Sekoni OO, Goodman OO. Dysmenorrhea and Its Effects on  
847 School Absenteeism and School Activities among Adolescents in Selected Secondary Schools  
848 in Ibadan, Nigeria. *Niger Med J*. 2017;58(4):143-8.
- 849 52. Opoku R, Dwumfour-Asare B, Agrey-Bluwey L, Appiah NE, Ackah M, Acquah F, et  
850 al. Prevalence of self-medication in Ghana: a systematic review and meta-analysis. *BMJ open*.  
851 2023;13:e064627.
- 852 53. Gneezy U, Meier S, Rey-Biel P. When and Why Incentives (Don't) Work to Modify  
853 Behavior. *Journal of Economic Perspectives*. 2011;25(4):191-210.
- 854
